# Supplementary material
Source: publisher site journal article supplement (https://www.dovepress.com/article/404494)
Supplement: Supplementary file 1 [file get_supplementary_file.php]

The procedure for separating the skin of a tonguefish is shown below.


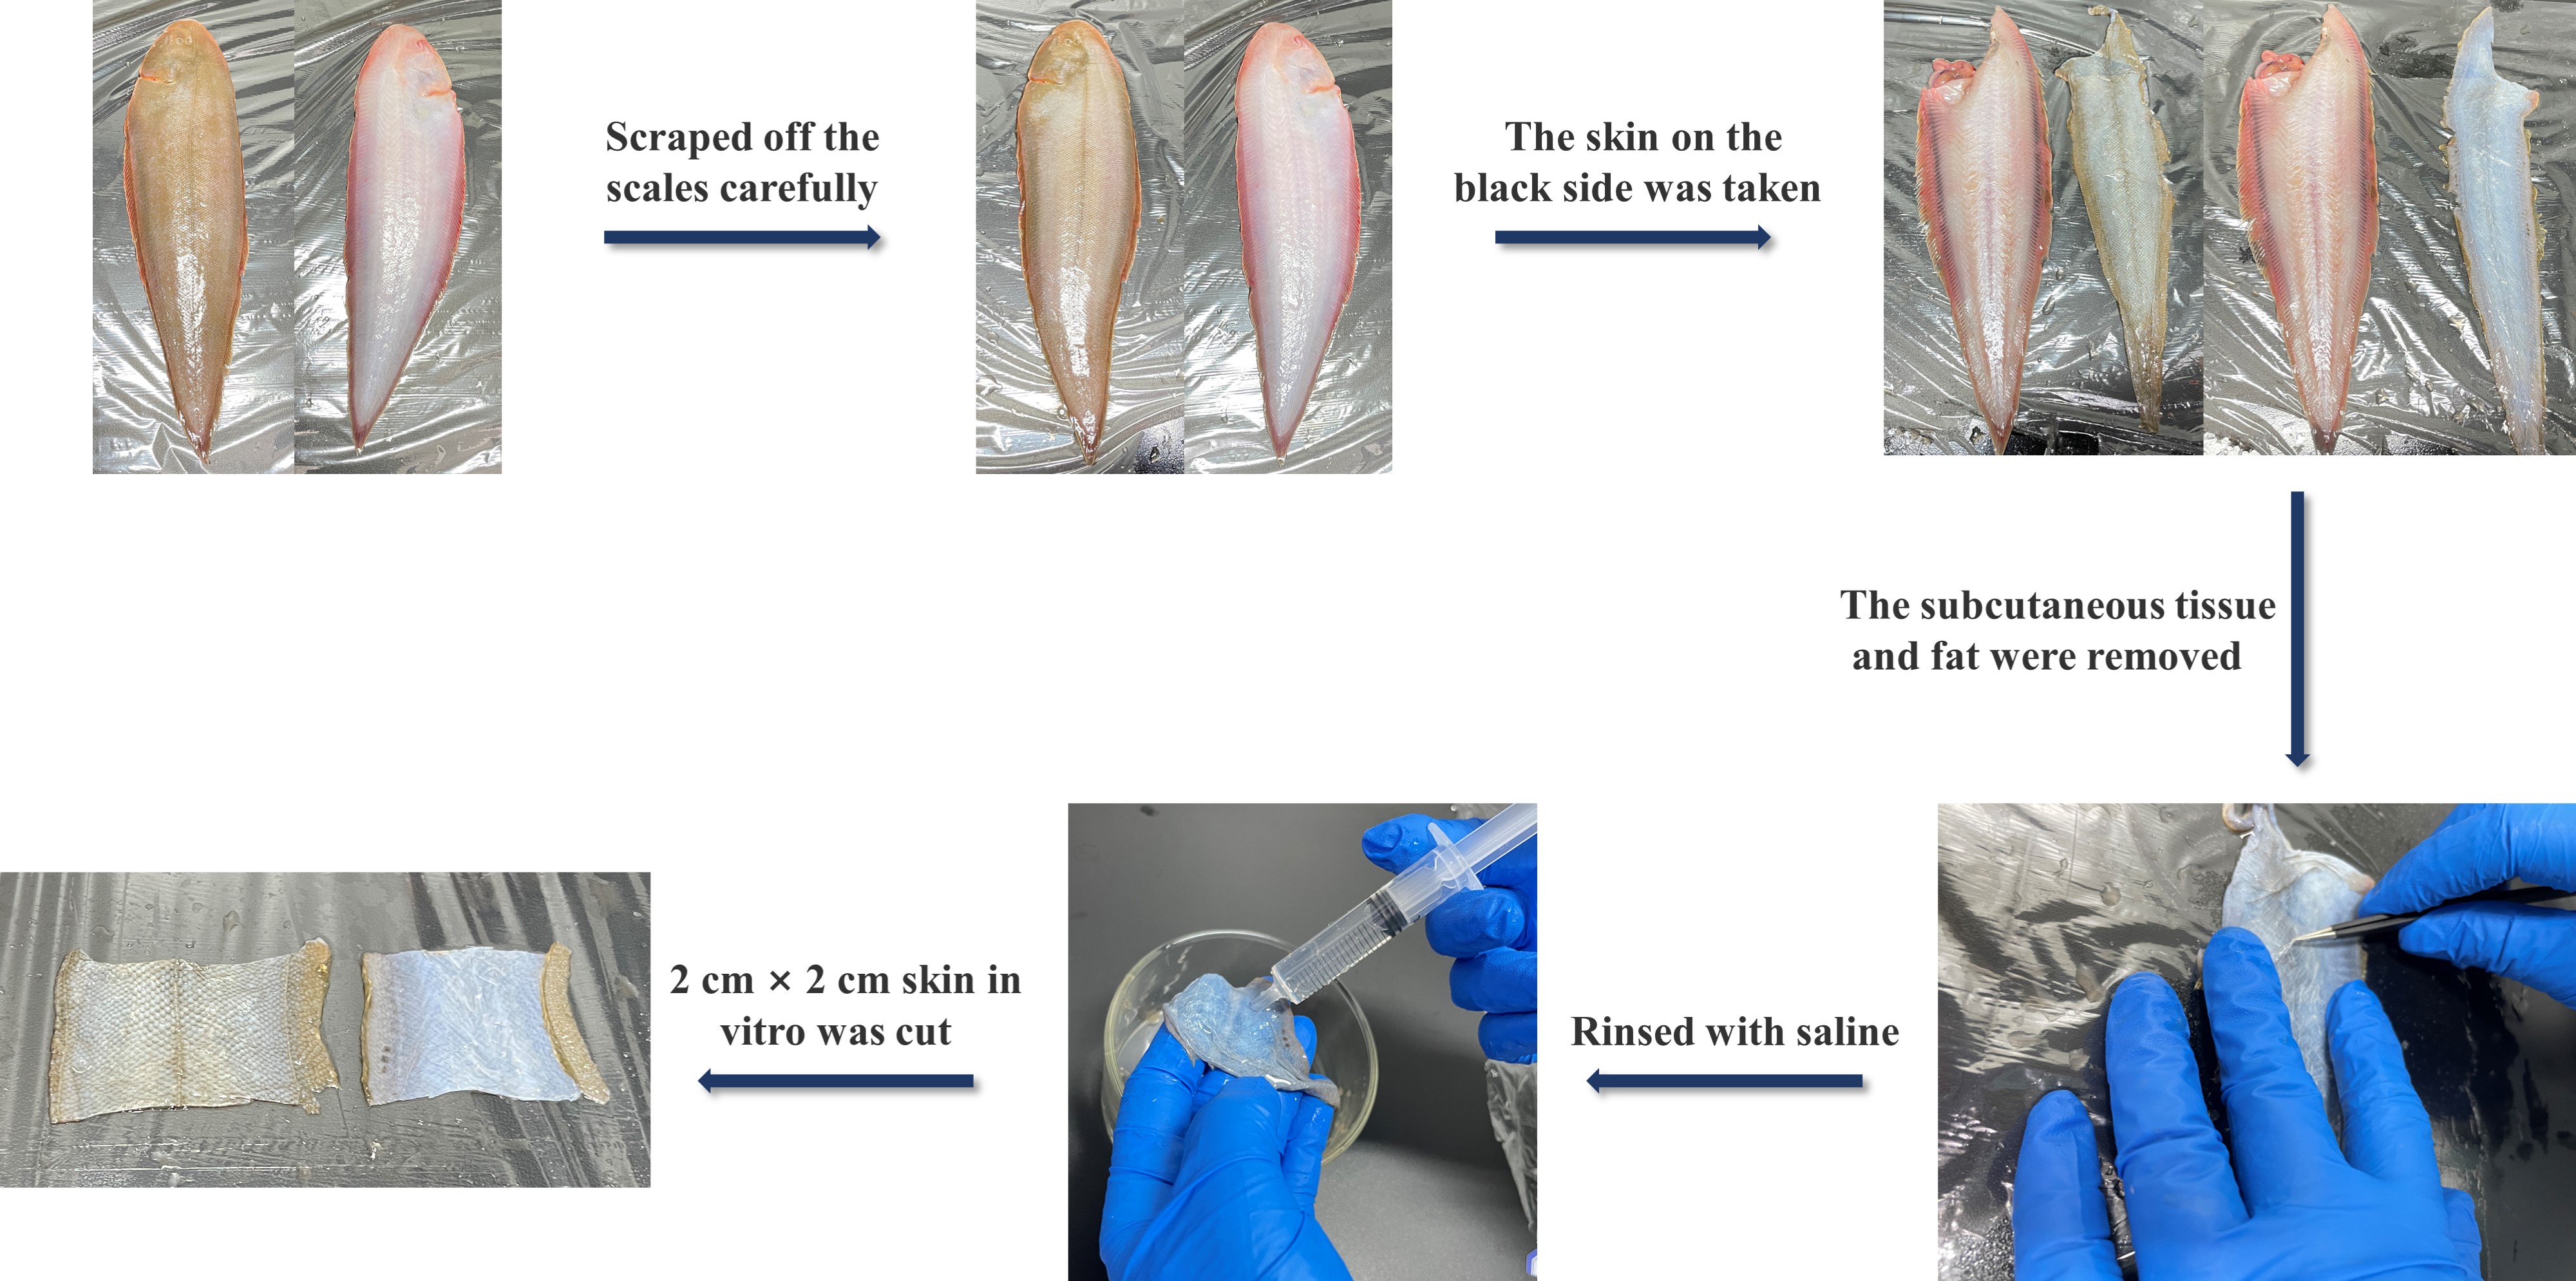


Figure S1. Procedure of skin separation of tonguefishes.
